# Supplementary material for: Silver–gold nanotubes containing hot spots on their surface: facile synthesis and surface-enhanced Raman scattering investigations
Source: Royal Society of Chemistry journal article supplement (doi:10.1039/c2ra21562d), 2012-01-01
Supplement: c2ra21562d.pdf [file c2ra21562d.pdf]

**Electronic Supplementary Information**

**Silver-Gold Nanotubes Containing Hot Spots on their Surface: Facile  
Synthesis and Surface-Enhanced Raman Scattering Investigations**

Jean C. S. Costa, Paola Corio\* and Pedro H. C. Camargo\*

*Departamento de Química Fundamental, Instituto de Química, Universidade de São Paulo  
Av. Lineu Prestes, 748, 05508-000, São Paulo-SP, Brazil*

*\*Corresponding authors. E-mails: [paola@iq.usp.br](mailto:paola@iq.usp.br), [camargo@iq.usp.br](mailto:camargo@iq.usp.br)*

## Experimental Procedures

### Materials and instrumentation

Analytical grade chemicals  $\text{HAuCl}_4 \cdot 3\text{H}_2\text{O}$ , (hydrogen tetrachloroaurate trihydrate),  $\text{AgNO}_3$  (silver nitrate, 99%), PVP (polyvinylpyrrolidone, M.W. 55.000 g/mol), EG (ethylene glycol), CV (crystal violet), sodium borohydride ( $\text{NaBH}_4$ ), 9-nitroanthracene, and benzo(a)pyrene were purchased from Aldrich or Merck, and were used as received. All solutions were prepared using deionized water (18.2 M $\Omega$ ). Glassware was cleaned with a piranha solution (3:1 concentrated  $\text{H}_2\text{SO}_4$  to 30%  $\text{H}_2\text{O}_2$ ) aqueous solution before use.

The scanning electron microscopy (FEG-SEM) images were obtained with a JEOL microscope, Mod.: FEG-SEM JSM 6330F operated at 5 kV. The samples for SEM were prepared by drop-casting an aqueous suspension of the nanostructures over a Si wafer, followed by drying under ambient conditions. Energy-dispersive X-ray spectroscopy (EDX, Thermo Electron Corporation) was performed at an acceleration voltage of 15 kV. We used a thick slab (>1  $\mu\text{m}$ ) of the NPs deposited onto a silicon wafer in combination with a beam spot of >50  $\mu\text{m}^2$  for at least three different regions in the sample in order to obtain average and reproducible EDS data from a large NPs ensemble. UV–VIS spectra were obtained with a Shimadzu UVPC-3101 scanning spectrophotometer. Raman spectra were acquired on a Renishaw Raman InVia equipped with a CCD detector and coupled to an Leica microscope that allows a rapid accumulation of Raman spectra with a spatial resolution of about 1  $\mu\text{m}$  (micro-Raman technique). The laser beam was focused on the sample by a  $\times 50$  lens. Laser power was always kept below 0.7 mW at the sample. The experiments were performed at ambient conditions using a back-scattering geometry. The samples were irradiated with the 632.8 nm line of a He–Ne laser (Spectra Physics).

### Synthesis of Ag nanowires (Ag NWs)

The synthesis of Ag NWs followed a modified polyol process.<sup>6, 17</sup> In a typical synthesis, 5 mL of ethylene glycol was transferred to a round bottom flask and heated to 160 °C under stirring for 1 h. Then, 3 mL of a 0.1 M  $\text{AgNO}_3$  solution in ethylene glycol (EG) and 3 mL of a 0.6 mol L<sup>-1</sup> PVP solution in EG were added simultaneously, using a peristaltic pump in the rate of 0.4 mL min<sup>-1</sup>, to the pre-heated EG. The reaction was allowed to proceed at this temperature

for 1 h before the product was collected by centrifugation, washed with water three times and re-suspended in water.

### **Synthesis of Ag-Au Nanotubes (Ag-Au NTs)**

For the synthesis of Au-Ag NTs, a suspension containing the Ag nanowires (100  $\mu\text{L}$ ) was added to 5 mL of an aqueous PVP solution (1 mg/mL) under magnetic stirring. This system was heated at 100  $^{\circ}\text{C}$  for 10 min. Then, 2 mL of a 0.1 M  $\text{HAuCl}_4 \cdot 3\text{H}_2\text{O}$  aqueous solution was added dropwise, causing a changing in color from light brown to violet. The solution was kept at 100  $^{\circ}\text{C}$  for another 10 min and the product was collected by centrifugation, washed with a saturated NaCl aqueous solution and re-suspended in water.

### **Sample preparation for SERS**

The samples were prepared by adding 100  $\mu\text{L}$  of the suspension containing the Ag NWs or the Ag-Au NTs to 50  $\mu\text{L}$  of  $1.0 \cdot 10^{-6}$  mol  $\text{L}^{-1}$  aqueous solutions of crystal violet, 9-nitroanthracene or benzo(a)pyrene. The final concentrations of analyte molecules were calculated as  $3.33 \cdot 10^{-7}$  mol  $\text{L}^{-1}$ . The SERS spectra were obtained 1 h after the sample preparation, in order to ensure that the adsorption equilibrium of the analytes over the metallic surfaces was reached.

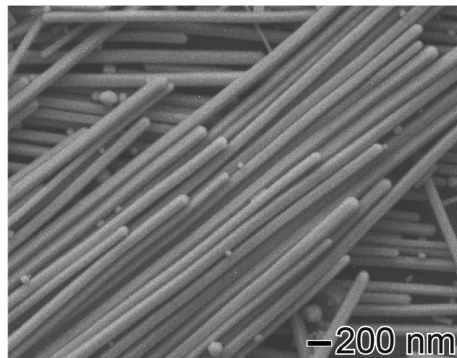

**Figure S1.** SEM images of Ag NWs obtained by the polyol process. The Ag NWs were  $93.5 \pm 5.0$  nm in width and  $> 3$   $\mu$ m in length.

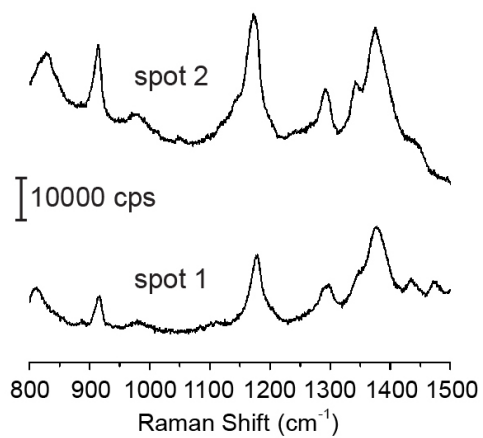

**Figure S2.** Typical CV SERS spectra obtained from spots 1 and 2 marked in Fig. 4A and B.
